# Supplementary material for: Maternal Depressive Symptoms and Child Behavior among Mexican Women and Their Children
Source: MDPI journal article supplement (doi:10.3390/ijerph14121566), 2017-12-18
Supplement: s1 [file s1]

# Maternal depressive symptoms and child behavior in Mexican women and their children

Emily P. Flynn, MD, MPH<sup>1</sup>, Esther O. Chung, BA<sup>2</sup>, Emily J. Ozer, PhD<sup>3</sup>, Lia C.H. Fernald, PhD, MBA<sup>3\*</sup>

**Table S1.** Adapted Behavior Problems Index

| Item in Spanish                                   | Item in English                            | Internalizing subscale | Externalizing subscale |
|---------------------------------------------------|--------------------------------------------|------------------------|------------------------|
| Discute mucho                                     | Argues a lot                               |                        | ✓                      |
| Se queja de que se siente solo                    | Complains of being alone                   | ✓                      |                        |
| Llora mucho                                       | Cries a lot                                | ✓                      |                        |
| Es abusador, cruel o malo con los demás           | Abusive, cruel, or mean to others          |                        | ✓                      |
| Exige mucha atención                              | Demands attention                          |                        | ✓                      |
| Destruye sus propias cosas                        | Destroys own things                        |                        | ✓                      |
| Destruye las pertenencias de sus familiares       | Destroys family members' things            |                        | ✓                      |
| Desobedece en la casa                             | Disobedient at home                        |                        | ✓                      |
| Tiene miedo de que pueda pensar o hacer algo malo | Afraid of thinking/doing something wrong   | ✓                      |                        |
| Siente que tiene que ser perfecto                 | Feels as though s/he has to be perfect     | ✓                      |                        |
| Siente o se queja de que nadie lo quiere          | Feels as though nobody loves her/him       | ✓                      |                        |
| Siente inferior o como de no valiera nada         | Feels worthless or inferior                | ✓                      |                        |
| Se involucra mucho en peleas                      | Fights a lot                               |                        | ✓                      |
| Se junta con gente que se involucra en problemas  | Spends time with people who get in trouble |                        | ✓                      |
| Prefiere estar solo en vez de estar con otros     | Prefers being alone to being with others   | ✓                      |                        |
| Dice mentiras o hace trampas                      | Tells lies, cheats                         |                        | ✓                      |
| Es nervioso, tenso                                | Is nervous, tense                          | ✓                      |                        |
| Es demasiado ansioso o miedoso                    | Is too anxious, afraid                     | ✓                      |                        |
| Se siente culpable por cualquier cosa             | Feels guilty for everything                | ✓                      |                        |

**Table S2.** Center for Epidemiologic Studies – Depression (CES-D) Scale

| Spanish                                                              | Item in English                                                                             | Subscales |          |          |
|----------------------------------------------------------------------|---------------------------------------------------------------------------------------------|-----------|----------|----------|
|                                                                      |                                                                                             | Somatic   | Negative | Positive |
| Las cosas que usualmente no le molestan.                             | You were bothered by things that usually don't bother you.                                  | ✓         |          |          |
| No ganas de comer; tenía mal apetito.                                | You did not feel like eating; your appetite was poor.                                       | ✓         |          |          |
| No podía quitarse de encima la tristeza aun con la familia o amigos. | You felt that you could not shake off the blues even with help from your family or friends. |           | ✓        |          |
| Yo era tan buena como cualquier otra persona.                        | You felt that you were just as good as other people.                                        |           |          | ✓        |
| Le costaba mantener su mente en lo que estaba haciendo.              | You had trouble keeping your mind on what you were doing.                                   | ✓         |          |          |
| Se sentía deprimida.                                                 | You felt depressed.                                                                         |           | ✓        |          |
| Lo que hacía era un esfuerzo.                                        | You felt that everything you did was an effort.                                             |           |          |          |
| Optimista sobre el futuro.                                           | You felt hopeful about the future.                                                          |           |          | ✓        |
| La vida había sido un fracaso.                                       | You thought your life had been a failure.                                                   |           | ✓        |          |
| Con miedo.                                                           | You felt fearful.                                                                           |           |          |          |
| Ansioso.                                                             | Your sleep was restless.                                                                    | ✓         |          |          |
| Contenta.                                                            | You were happy.                                                                             |           |          | ✓        |
| Menos de lo usual.                                                   | You talked less than usual.                                                                 | ✓         |          |          |
|                                                                      | You felt lonely.                                                                            |           |          |          |
| Relaciones amistosas.                                                | People were unfriendly.                                                                     |           |          |          |
| Disfrutaba la vida.                                                  | You enjoyed life.                                                                           |           |          | ✓        |
| Triste cuando lloraba.                                               | You had crying spells.                                                                      |           | ✓        |          |
| Triste.                                                              | You felt sad.                                                                               |           | ✓        |          |
| La gente no le caía bien.                                            | You felt that people disliked you.                                                          |           |          |          |
| No sabía hacer nada.                                                 | You could not get "going."                                                                  | ✓         |          |          |
